# Supplementary material
Source: PubMed Central journal article supplement (PMC8661864)

S1

**Kaplan-Meier survival estimates for all children in study cohort with a) leukemia/lymphoma versus solid tumors and b) moderate to severe lymphopenia versus no lymphopenia demonstrating time to first of two negative tests (n = 67)**

**Legend:** Kaplan-Meier survival curves demonstrating time in days to first negative SARS CoV2 PCR for a) children with leukemia/lymphoma (blue) versus a solid tumor (red) and b) moderate to severe lymphopenia (blue) versus no lymphopenia (red). p values were calculated using the log-rank test.

Figure a

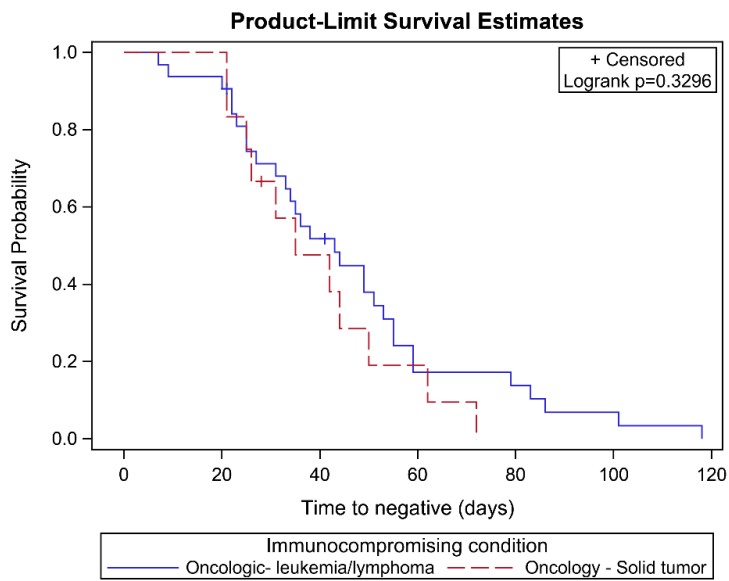

Figure b

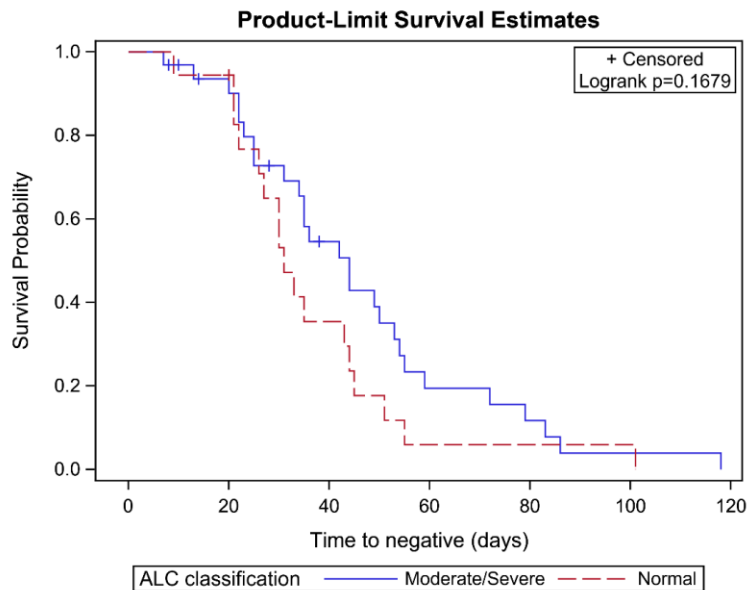

Supplement: PBC-68-0-s002.pdf [file PBC-68-0-s002.pdf]
